# Supplementary material for: Efficacy of Compound Herbal Medicine Tong‐Xie‐Yao‐Fang for Acute Radiation Enteritis and Its Potential Mechanisms: Evidence from Transcriptome Analysis
Source: Hindawi journal article supplement (doi:10.1155/2020/5481653), 2020-01-01
Supplement: f1 [file 5481653.f1.pdf]

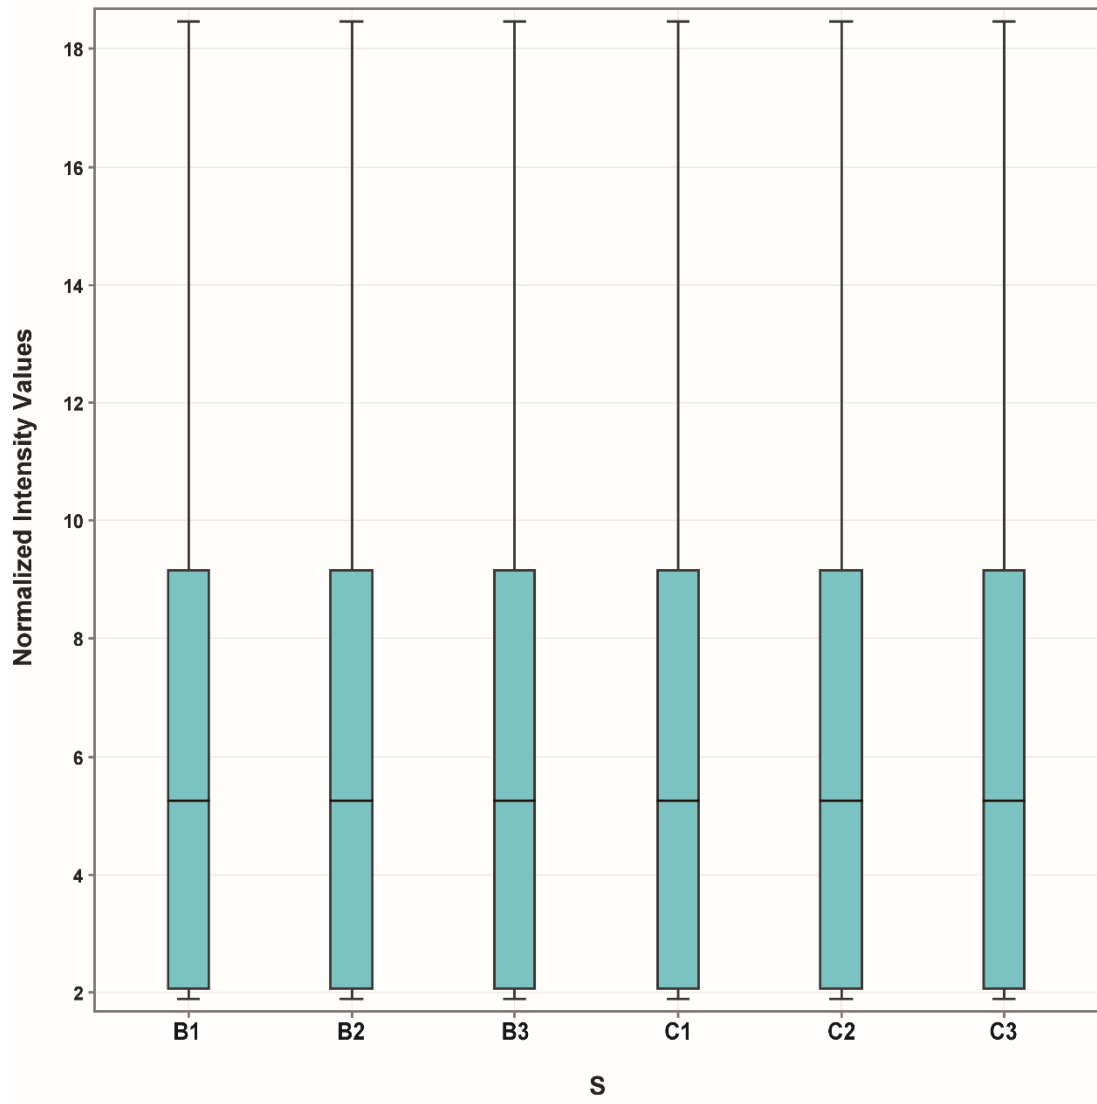

Figure S1. Relative logarithmic expression (RLE) boxplots for six samples

**Descriptions of Tab S1-3.**

Table S1. The list of 90 DEGs.

Table S2. GO enrichment analysis terms of upregulated DEGs.

Table S3. GO enrichment analysis terms of downregulated DEGs.

| GeneSymbol   | GeneName                                      | EntrezGeneID | Regulation(C_vs._B) |
|--------------|-----------------------------------------------|--------------|---------------------|
| Akap1        | A-kinase anchoring protein 1                  | 114124       | down                |
| Alas2        | 5'-aminolevulinate synthase 2                 | 25748        | up                  |
| Arhgap26     | Rho GTPase activating protein 26              | 307459       | down                |
| Asic4        | acid sensing ion channel subunit family memt  | 63882        | down                |
| Bcl3         | B-cell CLL/lymphoma 3                         | 680611       | down                |
| Bcl6         | B-cell CLL/lymphoma 6                         | 303836       | up                  |
| Bhlhb9       | basic helix-loop-helix family member B9       | 317407       | up                  |
| Bmx          | BMX non-receptor tyrosine kinase              | 367786       | up                  |
| Cacna1c      | calcium voltage-gated channel subunit alpha1  | 24239        | down                |
| Cdkl3        | cyclin-dependent kinase-like 3                | 60396        | up                  |
| Celf6        | CUGBP, Elav-like family member 6              | 300758       | down                |
| Chd11        | chromodomain helicase DNA binding protein     | 310707       | up                  |
| Chi3l1       | chitinase 3 like 1                            | 89824        | up                  |
| Col9a3       | collagen type IX alpha 3 chain                | 362285       | up                  |
| Cp           | ceruloplasmin                                 | 24268        | up                  |
| Cxcl11       | C-X-C motif chemokine ligand 11               | 305236       | down                |
| Dgkh         | diacylglycerol kinase, eta                    | 361076       | down                |
| Dlg5         | discs large MAGUK scaffold protein 5          | 305645       | down                |
| Dst          | dystonin                                      | 316313       | down                |
| Enpp2        | ectonucleotide pyrophosphatase/phosphodiect   | 84050        | up                  |
| Erp27        | endoplasmic reticulum protein 27              | 297698       | up                  |
| Fam180a      | family with sequence similarity 180, member   | 362336       | up                  |
| Fam199x      | family with sequence similarity 199, X-linked | 679168       | down                |
| Fcrl2        | Fc receptor-like 2                            | 310694       | up                  |
| Gpr174       | G protein-coupled receptor 174                | 302373       | up                  |
| Gprin3       | GPRIN family member 3                         | 502784       | down                |
| Grap2        | GRB2-related adaptor protein 2                | 366962       | down                |
| Grm4         | glutamate metabotropic receptor 4             | 24417        | up                  |
| Gypa         | glycophorin A                                 | 688972       | up                  |
| Hba1         | hemoglobin, alpha 1                           | 25632        | up                  |
| Hba2         | hemoglobin, alpha 2                           | 360504       | up                  |
| Hbb          | hemoglobin subunit beta                       | 24440        | up                  |
| Hbb-b1       | hemoglobin, beta adult major chain            | 361619       | up                  |
| Hbe2         | hemoglobin, epsilon 2                         | 502359       | up                  |
| Hira         | histone cell cycle regulator                  | 363849       | down                |
| Hunk         | hormonally upregulated Neu-associated kinase  | 288275       | down                |
| Klk1c8       | kallikrein 1-related peptidase C8             | 292866       | down                |
| Krtap7-1     | keratin associated protein 7-1                | 363741       | down                |
| Ldhc         | lactate dehydrogenase C                       | 29634        | up                  |
| Lmod2        | leiomodrin 2                                  | 296935       | down                |
| LOC100134871 | beta globin minor gene                        | 100134871    | up                  |
| LOC100909803 | uncharacterized LOC100909803                  | 100909803    | up                  |
| LOC100911266 | uncharacterized LOC100911266                  | 100911266    | up                  |
| LOC100912622 | uncharacterized LOC100912622                  | 100912622    | down                |
| LOC102548015 | uncharacterized LOC102548015                  | 102548015    | up                  |
| LOC102549174 | ankyrin repeat domain-containing protein 26-l | 102549174    | up                  |
| LOC102549287 | uncharacterized LOC102549287                  | 102549287    | up                  |
| LOC102550495 | uncharacterized LOC102550495                  | 102550495    | up                  |
| LOC103690979 | uncharacterized LOC103690979                  | 103690979    | down                |

|              |                                                |           |      |
|--------------|------------------------------------------------|-----------|------|
| LOC103691905 | uncharacterized LOC103691905                   | 103691905 | down |
| LOC103692634 | uncharacterized LOC103692634                   | 103692634 | down |
| LOC108349347 | disks large homolog 5-like                     | 108349347 | up   |
| LOC108351873 | endogenous retrovirus group K member 9 Pol     | 108351873 | down |
| LOC689064    | beta-globin                                    | 689064    | up   |
| Lpin1        | lipin 1                                        | 313977    | up   |
| Ly49si2      | immunoreceptor Ly49si2                         | 494207    | up   |
| Mob3c        | MOB kinase activator 3C                        | 313511    | down |
| Myo1g        | myosin IG                                      | 289785    | up   |
| Ncf1         | neutrophil cytosolic factor 1                  | 114553    | up   |
| Nphs1        | NPHS1 nephrin                                  | 64563     | down |
| Nxpe1        | neurexophilin and PC-esterase domain family    | 500992    | up   |
| Olr59        | olfactory receptor 59                          | 170816    | up   |
| Opn4         | opsin 4                                        | 192223    | up   |
| Palm         | paralemmin                                     | 170673    | down |
| Pbx2         | PBX homeobox 2                                 | 406164    | down |
| Pcdha3       | protocadherin alpha 3                          | 116780    | up   |
| Prnd         | prion like protein doppel                      | 113910    | up   |
| Rasgrp3      | RAS guanyl releasing protein 3                 | 313874    | up   |
| Rnf223       | ring finger protein 223                        | 680874    | down |
| Sgpp2        | sphingosine-1-phosphate phosphatase 2          | 301543    | down |
| Sh2d1a       | SH2 domain containing 1A                       | 501502    | up   |
| Slc4a1       | solute carrier family 4 member 1               | 24779     | up   |
| Sorbs2       | sorbin and SH3 domain containing 2             | 114901    | down |
| Stfa2l2      | stefin A2-like 2                               | 498087    | up   |
| Sult1a1      | sulfotransferase family 1A member 1            | 83783     | up   |
| Syne3        | spectrin repeat containing, nuclear envelope f | 299356    | down |
| Synpo2l      | synaptopodin 2-like                            | 305675    | down |
| Tab3         | TGF-beta activated kinase 1 and MAP3K7 bir     | 317546    | down |
| Tff2         | trefoil factor 2                               | 116592    | down |
| Tmed6        | transmembrane p24 trafficking protein 6        | 291991    | up   |
| Tmem235      | transmembrane protein 235                      | 688285    | up   |
| Tnfaip3      | TNF alpha induced protein 3                    | 683206    | down |
| Trim15       | tripartite motif containing 15                 | 100910806 | down |
| Uhrf1        | ubiquitin-like with PHD and ring finger doma   | 316129    | down |
| Usp35        | ubiquitin specific peptidase 35                | 308834    | down |
| Zbtb16       | zinc finger and BTB domain containing 16       | 353227    | up   |
| Zfp37        | zinc finger protein 37                         | 115768    | down |
| Zhx3         | zinc fingers and homeoboxes 3                  | 311604    | down |
| Znf768       | zinc finger protein 768                        | 102553763 | down |
| Zscan10      | zinc finger and SCAN domain containing 10      | 302962    | down |

| Term_ID    | Term_description                 | GeneSymbols              | P_value    | Category |
|------------|----------------------------------|--------------------------|------------|----------|
| GO:0005833 | hemoglobin complex               | Hbe2;LOC689064;Hbb-b1;LC | 1.05E-16   | CC       |
| GO:0072562 | blood microparticle              | LOC689064;Hbb;Cp;Hba-a2; | 7.76E-08   | CC       |
| GO:0022627 | cytosolic small ribosomal sub    | Hba1;Hba-a2              | 0.00814502 | CC       |
| GO:0031256 | leading edge membrane            | Myo1g                    | 0.01565143 | CC       |
| GO:0048787 | presynaptic active zone memb     | Grm4                     | 0.01565143 | CC       |
| GO:0043020 | NADPH oxidase complex            | Ncf1                     | 0.01952692 | CC       |
| GO:0032045 | guanyl-nucleotide exchange f     | Rasgrp3                  | 0.0214591  | CC       |
| GO:0031362 | anchored component of extern     | Prnd                     | 0.0310646  | CC       |
| GO:0001891 | phagocytic cup                   | Myo1g                    | 0.04624302 | CC       |
| GO:0005657 | replication fork                 | Bcl6                     | 0.04624302 | CC       |
| GO:0005344 | oxygen carrier activity          | Hbe2;LOC689064;Hbb-b1;LC | 6.86E-16   | MF       |
| GO:0019825 | oxygen binding                   | Hbe2;LOC689064;Hbb-b1;LC | 3.89E-14   | MF       |
| GO:0020037 | heme binding                     | Hbe2;LOC689064;Hbb-b1;LC | 2.30E-08   | MF       |
| GO:0005506 | iron ion binding                 | Hbe2;LOC689064;Hbb-b1;LC | 6.97E-08   | MF       |
| GO:0004601 | peroxidase activity              | Hba1;Hbb;Hba-a2          | 9.21E-06   | MF       |
| GO:0043325 | phosphatidylinositol-3,4-bisph   | Myo1g;Ncf1               | 0.00102297 | MF       |
| GO:0005070 | SH3/SH2 adaptor activity         | Sh2d1a;Fcr12             | 0.0013941  | MF       |
| GO:0005044 | scavenger receptor activity      | Fcr12;Enpp2              | 0.00422599 | MF       |
| GO:0000166 | nucleotide binding               | Sult1a1;Chd11            | 0.00511068 | MF       |
| GO:0005507 | copper ion binding               | Cp;Prnd                  | 0.00548639 | MF       |
| GO:0016616 | oxidoreductase activity, acting  | Ldhc                     | 0.0098713  | MF       |
| GO:0004551 | nucleotide diphosphatase acti    | Enpp2                    | 0.0098713  | MF       |
| GO:0050294 | steroid sulfotransferase activit | Sult1a1                  | 0.0098713  | MF       |
| GO:0004062 | aryl sulfotransferase activity   | Sult1a1                  | 0.0098713  | MF       |
| GO:0004322 | ferroxidase activity             | Cp                       | 0.0098713  | MF       |
| GO:0030492 | hemoglobin binding               | Hbb                      | 0.0098713  | MF       |
| GO:0047391 | alkylglycerophosphoethanolar     | Enpp2                    | 0.01183418 | MF       |
| GO:0016176 | superoxide-generating NADP       | Ncf1                     | 0.01574865 | MF       |
| GO:0008020 | G-protein coupled photorecep     | Opn4                     | 0.01574865 | MF       |
| GO:0004568 | chitinase activity               | Chi311                   | 0.01574865 | MF       |
| GO:0016175 | superoxide-generating NADP       | Ncf1                     | 0.01574865 | MF       |
| GO:0015108 | chloride transmembrane transp    | Slc4a1                   | 0.01770024 | MF       |
| GO:0008061 | chitin binding                   | Chi311                   | 0.01770024 | MF       |
| GO:0008510 | sodium:bicarbonate symporter     | Slc4a1                   | 0.01770024 | MF       |
| GO:0008066 | glutamate receptor activity      | Grm4                     | 0.01770024 | MF       |
| GO:0050662 | coenzyme binding                 | Alas2                    | 0.01964807 | MF       |
| GO:0001206 | transcriptional repressor activi | Zbtb16                   | 0.02159216 | MF       |
| GO:0005088 | Ras guanyl-nucleotide exchan     | Rasgrp3                  | 0.02546914 | MF       |
| GO:0008195 | phosphatidate phosphatase act    | Lpin1                    | 0.02546914 | MF       |
| GO:0015106 | bicarbonate transmembrane tr     | Slc4a1                   | 0.02740203 | MF       |
| GO:0016594 | glycine binding                  | Alas2                    | 0.02933121 | MF       |
| GO:0030247 | polysaccharide binding           | Enpp2                    | 0.03317844 | MF       |
| GO:0042975 | peroxisome proliferator activa   | Lpin1                    | 0.03701088 | MF       |
| GO:0004622 | lysophospholipase activity       | Enpp2                    | 0.03701088 | MF       |
| GO:0015301 | anion:anion antiporter activity  | Slc4a1                   | 0.03892158 | MF       |
| GO:0005452 | inorganic anion exchanger act    | Slc4a1                   | 0.03892158 | MF       |
| GO:0017016 | Ras GTPase binding               | Rasgrp3                  | 0.04082859 | MF       |
| GO:0030506 | ankyrin binding                  | Slc4a1                   | 0.04082859 | MF       |
| GO:0004003 | ATP-dependent DNA helicase       | Chd11                    | 0.04273194 | MF       |
| GO:0030246 | carbohydrate binding             | Chi311;Ly49si2           | 0.04881282 | MF       |
| GO:0015671 | oxygen transport                 | Hbe2;LOC689064;Hbb-b1;LC | 6.40E-16   | BP       |

|            |                                                            |                        |            |    |
|------------|------------------------------------------------------------|------------------------|------------|----|
| GO:0048821 | erythrocyte development                                    | Hba1;Hbb;Bcl6;Hba-a2   | 1.26E-07   | BP |
| GO:0042744 | hydrogen peroxide catabolic process                        | Hba1;Hbb;Hba-a2        | 5.47E-06   | BP |
| GO:0042542 | response to hydrogen peroxide                              | Slc4a1;Hbb;Hba-a2;Hba1 | 1.74E-05   | BP |
| GO:0006968 | cellular defense response                                  | Sh2d1a;Ncf1            | 0.00020201 | BP |
| GO:0010942 | positive regulation of cell death                          | Hba1;Hbb;Hba-a2        | 0.00026258 | BP |
| GO:0031065 | positive regulation of histone methylation                 | Lpin1;Bcl6             | 0.00043806 | BP |
| GO:0001953 | negative regulation of cell migration                      | Bcl6;Enpp2             | 0.00049586 | BP |
| GO:0051291 | protein heterooligomerization                              | Hba1;Hbb;Hba-a2        | 0.00108805 | BP |
| GO:0071276 | cellular response to cadmium                               | Enpp2;Ncf1             | 0.00156097 | BP |
| GO:0009967 | positive regulation of signal transduction                 | Sh2d1a;Fcr12           | 0.00276494 | BP |
| GO:0006879 | cellular iron ion homeostasis                              | Cp;Alas2               | 0.00333701 | BP |
| GO:0043087 | regulation of GTPase activity                              | Rasgrp3;Bcl6           | 0.00715144 | BP |
| GO:0009812 | flavonoid metabolic process                                | Sult1a1                | 0.00974316 | BP |
| GO:0014051 | gamma-aminobutyric acid secretion                          | Grm4                   | 0.00974316 | BP |
| GO:0016056 | rhodopsin mediated signaling                               | Opn4                   | 0.00974316 | BP |
| GO:0072606 | interleukin-8 secretion                                    | Chi311                 | 0.00974316 | BP |
| GO:0045629 | negative regulation of T-helper cell activation            | Bcl6                   | 0.00974316 | BP |
| GO:0006584 | catecholamine metabolic process                            | Sult1a1                | 0.00974316 | BP |
| GO:0030097 | hemopoiesis                                                | Zbtb16;Hbb             | 0.01016261 | BP |
| GO:0042541 | hemoglobin biosynthetic process                            | Alas2                  | 0.01168071 | BP |
| GO:0006642 | triglyceride mobilization                                  | Lpin1                  | 0.01168071 | BP |
| GO:0051138 | positive regulation of NK T cell activation                | Zbtb16                 | 0.01168071 | BP |
| GO:0071800 | podosome assembly                                          | Ncf1                   | 0.01168071 | BP |
| GO:0002467 | germinal center formation                                  | Bcl6                   | 0.01361457 | BP |
| GO:0070741 | response to interleukin-6                                  | Chi311                 | 0.01361457 | BP |
| GO:0038096 | Fc-gamma receptor signaling pathway                        | Myo1g                  | 0.01361457 | BP |
| GO:2000394 | positive regulation of lamellipodium formation             | Enpp2                  | 0.01361457 | BP |
| GO:0014823 | response to activity                                       | Sult1a1;Slc4a1         | 0.01539663 | BP |
| GO:0045986 | negative regulation of smooth muscle cell proliferation    | Ncf1                   | 0.01554477 | BP |
| GO:0006782 | protoporphyrinogen IX biosynthesis                         | Alas2                  | 0.01554477 | BP |
| GO:0050427 | 3'-phosphoadenosine 5'-phosphoribosyl transferase activity | Sult1a1                | 0.01554477 | BP |
| GO:0001878 | response to yeast                                          | Ncf1                   | 0.01554477 | BP |
| GO:0006691 | leukotriene metabolic process                              | Ncf1                   | 0.01554477 | BP |
| GO:0006032 | chitin catabolic process                                   | Chi311                 | 0.01554477 | BP |
| GO:0019752 | carboxylic acid metabolic process                          | Ldhc                   | 0.01554477 | BP |
| GO:0072678 | T cell migration                                           | Myo1g                  | 0.01554477 | BP |
| GO:0002829 | negative regulation of type 2 interferon production        | Bcl6                   | 0.01554477 | BP |
| GO:0002456 | T cell mediated immunity                                   | Myo1g                  | 0.01554477 | BP |
| GO:0007196 | adenylate cyclase-inhibiting activity                      | Grm4                   | 0.01747129 | BP |
| GO:0050665 | hydrogen peroxide biosynthesis                             | Ncf1                   | 0.01747129 | BP |
| GO:0006898 | receptor-mediated endocytosis                              | Fcr12;Enpp2            | 0.01788076 | BP |
| GO:0045730 | respiratory burst                                          | Ncf1                   | 0.01939416 | BP |
| GO:0006090 | pyruvate metabolic process                                 | Ldhc                   | 0.01939416 | BP |
| GO:0051923 | sulfation                                                  | Sult1a1                | 0.01939416 | BP |
| GO:0018298 | protein-chromophore linkage                                | Opn4                   | 0.01939416 | BP |
| GO:0006825 | copper ion transport                                       | Cp                     | 0.01939416 | BP |
| GO:0045741 | positive regulation of epidermal cell proliferation        | Ncf1                   | 0.01939416 | BP |
| GO:0005975 | carbohydrate metabolic process                             | Chi311;Ldhc            | 0.01984801 | BP |
| GO:0032025 | response to cobalt ion                                     | Alas2                  | 0.02131338 | BP |

|            |                                   |                  |            |    |
|------------|-----------------------------------|------------------|------------|----|
| GO:0008210 | estrogen metabolic process        | Sult1a1          | 0.02131338 | BP |
| GO:0051272 | positive regulation of cellular   | Bcl6             | 0.02131338 | BP |
| GO:0042554 | superoxide anion generation       | Ncf1             | 0.02131338 | BP |
| GO:0050805 | negative regulation of synaptic   | Grm4             | 0.02322895 | BP |
| GO:0097484 | dendrite extension                | Cdkl3            | 0.02322895 | BP |
| GO:2000773 | negative regulation of cellular   | Bcl6             | 0.02322895 | BP |
| GO:0045591 | positive regulation of regulato   | Bcl6             | 0.02322895 | BP |
| GO:0019432 | triglyceride biosynthetic proc    | Lpin1            | 0.02322895 | BP |
| GO:0006878 | cellular copper ion homeostas     | Prnd             | 0.02322895 | BP |
| GO:0009062 | fatty acid catabolic process      | Lpin1            | 0.02514087 | BP |
| GO:0007340 | acrosome reaction                 | Prnd             | 0.02704917 | BP |
| GO:0006068 | ethanol catabolic process         | Sult1a1          | 0.02704917 | BP |
| GO:0001823 | mesonephros development           | Zbtb16           | 0.02704917 | BP |
| GO:0035137 | hindlimb morphogenesis            | Zbtb16           | 0.02704917 | BP |
| GO:0031529 | ruffle organization               | Lpin1            | 0.02704917 | BP |
| GO:0035136 | forelimb morphogenesis            | Zbtb16           | 0.02704917 | BP |
| GO:0061036 | positive regulation of cartilage  | Zbtb16           | 0.02704917 | BP |
| GO:0051932 | synaptic transmission, GABA       | Grm4             | 0.02704917 | BP |
| GO:0006820 | anion transport                   | Slc4a1           | 0.02704917 | BP |
| GO:0030324 | lung development                  | Cp;Chi311        | 0.02740296 | BP |
| GO:0009414 | response to water deprivation     | Slc4a1           | 0.02895384 | BP |
| GO:0010447 | response to acidic pH             | Slc4a1           | 0.0308549  | BP |
| GO:0007602 | phototransduction                 | Opn4             | 0.0308549  | BP |
| GO:0007250 | activation of NF-kappaB-indu      | Chi311           | 0.0308549  | BP |
| GO:0006754 | ATP biosynthetic process          | Ldhc             | 0.0308549  | BP |
| GO:0017085 | response to insecticide           | Sult1a1          | 0.0308549  | BP |
| GO:0035634 | response to stilbenoid            | Hba1             | 0.0308549  | BP |
| GO:0006783 | heme biosynthetic process         | Alas2            | 0.0308549  | BP |
| GO:0009395 | phospholipid catabolic proces     | Enpp2            | 0.03275233 | BP |
| GO:0045598 | regulation of fat cell differenti | Lpin1            | 0.03464617 | BP |
| GO:0006801 | superoxide metabolic process      | Ncf1             | 0.03464617 | BP |
| GO:0032332 | positive regulation of chondro    | Zbtb16           | 0.0365364  | BP |
| GO:0031589 | cell-substrate adhesion           | Myo1g            | 0.0365364  | BP |
| GO:0007283 | spermatogenesis                   | Pcdha3;Bcl6;Prnd | 0.03737964 | BP |
| GO:0050832 | defense response to fungus        | Ncf1             | 0.03842304 | BP |
| GO:0006612 | protein targeting to membrane     | Ncf1             | 0.03842304 | BP |
| GO:0008285 | negative regulation of cell pro   | Zbtb16;Bcl6;Grm4 | 0.03964269 | BP |
| GO:0048714 | positive regulation of oligoder   | Enpp2            | 0.0403061  | BP |
| GO:0046685 | response to arsenic-containing    | Slc4a1           | 0.0403061  | BP |
| GO:0015698 | inorganic anion transport         | Slc4a1           | 0.0403061  | BP |
| GO:1900745 | positive regulation of p38MA      | Ncf1             | 0.0403061  | BP |
| GO:0045638 | negative regulation of myeloic    | Zbtb16           | 0.0403061  | BP |
| GO:0035024 | negative regulation of Rho pr     | Bcl6             | 0.04218558 | BP |
| GO:0045778 | positive regulation of ossificat  | Zbtb16           | 0.04218558 | BP |
| GO:0000266 | mitochondrial fission             | Lpin1            | 0.04218558 | BP |
| GO:0030517 | negative regulation of axon ex    | Cdkl3            | 0.04406148 | BP |
| GO:0061003 | positive regulation of dendriti   | Bhlhb9           | 0.04593382 | BP |
| GO:0015701 | bicarbonate transport             | Slc4a1           | 0.04593382 | BP |

GO:0051966 regulation of synaptic transmi:Grm4

0.0478026 BP



| Term_ID    | Term_description         | GeneSymb   | P_value  | Category |
|------------|--------------------------|------------|----------|----------|
| GO:0014069 | postsynaptic density     | Palm;Dst;I | 5.65E-05 | CC       |
| GO:0030018 | Z disc                   | Cacna1c;S  | 0.001057 | CC       |
| GO:0009898 | cytoplasmic side of pl   | Palm;Dst   | 0.003534 | CC       |
| GO:1990454 | L-type voltage-gated c   | Cacna1c    | 0.011435 | CC       |
| GO:0005634 | nucleus                  | Palm;Pbx2  | 0.012813 | CC       |
| GO:0036057 | slit diaphragm           | Nphs1      | 0.013058 | CC       |
| GO:0044309 | neuron spine             | Palm       | 0.013058 | CC       |
| GO:0097512 | cardiac myofibril        | Lmod2      | 0.014678 | CC       |
| GO:0034993 | LINC complex             | Syne3      | 0.014678 | CC       |
| GO:0030056 | hemidesmosome            | Dst        | 0.016296 | CC       |
| GO:0000791 | euchromatin              | Uhrf1      | 0.016296 | CC       |
| GO:0042383 | sarcolemma               | Cacna1c;D  | 0.017544 | CC       |
| GO:0005865 | striated muscle thin fil | Lmod2      | 0.017912 | CC       |
| GO:0030061 | mitochondrial crista     | Akap1      | 0.019525 | CC       |
| GO:0032591 | dendritic spine membe    | Palm       | 0.019525 | CC       |
| GO:0097038 | perinuclear endoplasr    | Dst        | 0.024348 | CC       |
| GO:0005635 | nuclear envelope         | Syne3;Dst  | 0.02725  | CC       |
| GO:0031527 | filopodium membrane      | Palm       | 0.027551 | CC       |
| GO:0005665 | DNA-directed RNA p       | Znf768     | 0.029148 | CC       |
| GO:0035371 | microtubule plus-end     | Dst        | 0.032336 | CC       |
| GO:0005640 | nuclear outer membra     | Syne3      | 0.033926 | CC       |
| GO:0016327 | apicolateral plasma m    | Palm       | 0.033926 | CC       |
| GO:0043234 | protein complex          | Hira;Cacn  | 0.034446 | CC       |
| GO:0015629 | actin cytoskeleton       | Synpo2l;D  | 0.036099 | CC       |
| GO:0005657 | replication fork         | Uhrf1      | 0.038681 | CC       |
| GO:0005891 | voltage-gated calcium    | Cacna1c    | 0.038681 | CC       |
| GO:0031430 | M band                   | Lmod2      | 0.044985 | CC       |
| GO:0005720 | nuclear heterochromat    | Uhrf1      | 0.044985 | CC       |
| GO:0032590 | dendrite membrane        | Palm       | 0.044985 | CC       |
| GO:0045211 | postsynaptic membran     | Cacna1c;A  | 0.046299 | CC       |
| GO:0051393 | alpha-actinin binding    | Cacna1c;N  | 0.000828 | MF       |
| GO:0019904 | protein domain specifi   | Akap1;Cac  | 0.00374  | MF       |
| GO:0008092 | cytoskeletal protein bi  | Dlg5;Syne  | 0.006294 | MF       |
| GO:0004843 | thiol-dependent ubiqu    | Tnfaip3;U  | 0.007907 | MF       |
| GO:0048248 | CXCR3 chemokine re       | Cxcl11     | 0.009275 | MF       |
| GO:0003779 | actin binding            | Synpo2l;D  | 0.009322 | MF       |
| GO:0061578 | Lys63-specific deubiq    | Tnfaip3    | 0.01112  | MF       |
| GO:0030346 | protein phosphatase 2l   | Akap1      | 0.016635 | MF       |
| GO:0042379 | chemokine receptor bi    | Cxcl11     | 0.018467 | MF       |
| GO:0004143 | diacylglycerol kinase    | Dgkh       | 0.018467 | MF       |
| GO:0051010 | microtubule plus-end     | Dst        | 0.022121 | MF       |
| GO:0008331 | high voltage-gated cal   | Cacna1c    | 0.022121 | MF       |
| GO:0005272 | sodium channel activi    | Asic4      | 0.027577 | MF       |
| GO:0005523 | tropomyosin binding      | Lmod2      | 0.027577 | MF       |
| GO:0003714 | transcription corepres   | Hira;Zhx3  | 0.028946 | MF       |
| GO:0003951 | NAD+ kinase activity     | Dgkh       | 0.031197 | MF       |
| GO:0046872 | metal ion binding        | Tab3;Zsca  | 0.031672 | MF       |
| GO:0008327 | methyl-CpG binding       | Uhrf1      | 0.033003 | MF       |
| GO:0031491 | nucleosome binding       | Hira       | 0.036604 | MF       |

|            |                          |            |          |    |
|------------|--------------------------|------------|----------|----|
| GO:0003700 | DNA binding transcrip    | Bcl3;Zhx3  | 0.037023 | MF |
| GO:0003677 | DNA binding              | Zfp37;Tnf  | 0.03794  | MF |
| GO:0034237 | protein kinase A regul   | Akap1      | 0.0384   | MF |
| GO:0070530 | K63-linked polyubiqu     | Tnfaip3    | 0.040193 | MF |
| GO:0031369 | translation initiation f | Cacna1c    | 0.043768 | MF |
| GO:0017022 | myosin binding           | Nphs1      | 0.04733  | MF |
| GO:0000987 | proximal promoter sec    | Uhrf1      | 0.04733  | MF |
| GO:0003785 | actin monomer bindin     | Lmod2      | 0.04733  | MF |
| GO:0030011 | maintenance of cell pc   | Dlg5;Dst   | 4.30E-05 | BP |
| GO:0007010 | cytoskeleton organizat   | Syne3;Palr | 0.00125  | BP |
| GO:0006351 | transcription, DNA-te    | Zscan10;H  | 0.001326 | BP |
| GO:0060999 | positive regulation of   | Dlg5;Palm  | 0.001749 | BP |
| GO:0030838 | positive regulation of   | Nphs1;Lm   | 0.00322  | BP |
| GO:0070098 | chemokine-mediated s     | Cxcl11;Tff | 0.004483 | BP |
| GO:0016579 | protein deubiquitinatio  | Tnfaip3;U  | 0.006646 | BP |
| GO:0086045 | membrane depolarizat     | Cacna1c    | 0.008601 | BP |
| GO:0042536 | negative regulation of   | Bcl3       | 0.008601 | BP |
| GO:0050728 | negative regulation of   | Tff2;Tnfai | 0.009836 | BP |
| GO:0010216 | maintenance of DNA       | Uhrf1      | 0.010312 | BP |
| GO:0060455 | negative regulation of   | Tff2       | 0.010312 | BP |
| GO:0002455 | humoral immune resp      | Bcl3       | 0.010312 | BP |
| GO:0051101 | regulation of DNA bir    | Bcl3       | 0.010312 | BP |
| GO:0051534 | negative regulation of   | Akap1      | 0.010312 | BP |
| GO:0043031 | negative regulation of   | Tff2       | 0.010312 | BP |
| GO:0031581 | hemidesmosome asser      | Dst        | 0.010312 | BP |
| GO:0007015 | actin filament organiz   | Sorbs2;Lm  | 0.010496 | BP |
| GO:0050869 | negative regulation of   | Tnfaip3    | 0.012021 | BP |
| GO:0072205 | metanephric collectin    | Dlg5       | 0.012021 | BP |
| GO:0086012 | membrane depolarizat     | Cacna1c    | 0.012021 | BP |
| GO:0002467 | germinal center forma    | Bcl3       | 0.012021 | BP |
| GO:2000347 | positive regulation of   | Tnfaip3    | 0.012021 | BP |
| GO:0030252 | growth hormone secre     | Cacna1c    | 0.012021 | BP |
| GO:1900246 | positive regulation of   | Trim15     | 0.012021 | BP |
| GO:0045088 | regulation of innate in  | Tnfaip3    | 0.013727 | BP |
| GO:0051694 | pointed-end actin filar  | Lmod2      | 0.013727 | BP |
| GO:0035331 | negative regulation of   | Dlg5       | 0.013727 | BP |
| GO:0001505 | regulation of neurotra   | Celf6      | 0.013727 | BP |
| GO:0090286 | cytoskeletal anchoring   | Syne3      | 0.013727 | BP |
| GO:0045010 | actin nucleation         | Lmod2      | 0.013727 | BP |
| GO:0032836 | glomerular basement m    | Nphs1      | 0.01543  | BP |
| GO:0046620 | regulation of organ gr   | Cacna1c    | 0.01543  | BP |
| GO:0060074 | synapse maturation       | Palm       | 0.01543  | BP |
| GO:0010818 | T cell chemotaxis        | Cxcl11     | 0.01543  | BP |
| GO:0002315 | marginal zone B cell c   | Bcl3       | 0.01543  | BP |
| GO:0045176 | apical protein localiza  | Dlg5       | 0.01713  | BP |
| GO:0061337 | cardiac conduction       | Cacna1c    | 0.01713  | BP |
| GO:0072015 | glomerular visceral ep   | Nphs1      | 0.01713  | BP |
| GO:0042088 | T-helper 1 type immu     | Bcl3       | 0.01713  | BP |

|            |                         |            |          |    |
|------------|-------------------------|------------|----------|----|
| GO:0035871 | protein K11-linked de   | Tnfaip3    | 0.01713  | BP |
| GO:0031110 | regulation of microtub  | Dst        | 0.01713  | BP |
| GO:0010225 | response to UV-C        | Bcl3       | 0.01713  | BP |
| GO:0008090 | retrograde axonal tran  | Dst        | 0.018828 | BP |
| GO:0010390 | histone monoubiquitir   | Uhrf1      | 0.018828 | BP |
| GO:0002237 | response to molecule c  | Tnfaip3    | 0.018828 | BP |
| GO:0035308 | negative regulation of  | Akap1      | 0.018828 | BP |
| GO:0098911 | regulation of ventricul | Cacna1c    | 0.018828 | BP |
| GO:0032691 | negative regulation of  | Tnfaip3    | 0.018828 | BP |
| GO:0008360 | regulation of cell shap | Syne3;Palr | 0.02016  | BP |
| GO:1903364 | positive regulation of  | Tnfaip3    | 0.020522 | BP |
| GO:0061049 | cell growth involved i  | Sorbs2     | 0.020522 | BP |
| GO:0003094 | glomerular filtration   | Nphs1      | 0.020522 | BP |
| GO:0002690 | positive regulation of  | Cxcl11     | 0.020522 | BP |
| GO:0032495 | response to muramyl c   | Tnfaip3    | 0.020522 | BP |
| GO:0090150 | establishment of prote  | Syne3      | 0.020522 | BP |
| GO:0010614 | negative regulation of  | Akap1      | 0.020522 | BP |
| GO:0032233 | positive regulation of  | Synpo2l    | 0.022214 | BP |
| GO:0016574 | histone ubiquitination  | Uhrf1      | 0.022214 | BP |
| GO:0045824 | negative regulation of  | Tnfaip3    | 0.022214 | BP |
| GO:0016310 | phosphorylation         | Dgkh;Akap1 | 0.023542 | BP |
| GO:0043950 | positive regulation of  | Cxcl11     | 0.023903 | BP |
| GO:0086002 | cardiac muscle cell ac  | Cacna1c    | 0.023903 | BP |
| GO:0071625 | vocalization behavior   | Celf6      | 0.023903 | BP |
| GO:0030330 | DNA damage respons      | Bcl3       | 0.023903 | BP |
| GO:0045104 | intermediate filament   | Dst        | 0.025589 | BP |
| GO:0045197 | establishment or main   | Dlg5       | 0.025589 | BP |
| GO:1902187 | negative regulation of  | Trim15     | 0.025589 | BP |
| GO:0030816 | positive regulation of  | Cxcl11     | 0.027272 | BP |
| GO:0006939 | smooth muscle contra    | Cacna1c    | 0.027272 | BP |
| GO:0010738 | regulation of protein k | Akap1      | 0.027272 | BP |
| GO:0032703 | negative regulation of  | Tnfaip3    | 0.027272 | BP |
| GO:0032481 | positive regulation of  | Trim15     | 0.028952 | BP |
| GO:0032270 | positive regulation of  | Uhrf1      | 0.028952 | BP |
| GO:0019229 | regulation of vasocons  | Cacna1c    | 0.028952 | BP |
| GO:0035418 | protein localization to | Nphs1      | 0.028952 | BP |
| GO:0048870 | cell motility           | Dst        | 0.03063  | BP |
| GO:0051056 | regulation of small G1  | Arhgap26   | 0.03063  | BP |
| GO:0017156 | calcium ion regulated   | Cacna1c    | 0.03063  | BP |
| GO:0042692 | muscle cell differentia | Hira       | 0.03063  | BP |
| GO:0071257 | cellular response to el | Palm       | 0.03063  | BP |
| GO:1903507 | negative regulation of  | Hira       | 0.033977 | BP |
| GO:0030818 | negative regulation of  | Palm       | 0.033977 | BP |
| GO:0070536 | protein K63-linked de   | Tnfaip3    | 0.035646 | BP |
| GO:0046907 | intracellular transport | Dst        | 0.037312 | BP |
| GO:0007520 | myoblast fusion         | Nphs1      | 0.037312 | BP |
| GO:0045736 | negative regulation of  | Tnfaip3    | 0.037312 | BP |
| GO:0070509 | calcium ion import      | Cacna1c    | 0.038976 | BP |

|            |                         |         |          |    |
|------------|-------------------------|---------|----------|----|
| GO:0006336 | DNA replication-inde    | Hira    | 0.038976 | BP |
| GO:0060441 | epithelial tube branchi | Dlg5    | 0.040637 | BP |
| GO:0030041 | actin filament polyme   | Lmod2   | 0.040637 | BP |
| GO:1902042 | negative regulation of  | Tnfaip3 | 0.042295 | BP |
| GO:0007194 | negative regulation of  | Palm    | 0.042295 | BP |
| GO:0071108 | protein K48-linked de   | Tnfaip3 | 0.042295 | BP |
| GO:0009954 | proximal/distal patter  | Pbx2    | 0.04395  | BP |
| GO:0042832 | defense response to pr  | Bcl3    | 0.047252 | BP |
| GO:0007205 | protein kinase C-activ  | Dgkh    | 0.047252 | BP |
| GO:0007586 | digestion               | Tff2    | 0.047252 | BP |
| GO:2000352 | negative regulation of  | Tnfaip3 | 0.048899 | BP |
